# Supplementary material for: Identification of quantitative trait loci underlying five major agronomic traits of soybean in three biparental populations by specific length amplified fragment sequencing (SLAF-seq)
Source: PeerJ. 2021 Dec 14;9:e12416. doi: 10.7717/peerj.12416 (PMC8679901; doi:10.7717/peerj.12416)
Supplement: Supplemental Information 9 [file peerj-09-12416-s009.xlsx]

## Sheet: Sheet1
	Flowering time	Plant height	Branch number	Node number of main stem	Pods per plant
1	69	107	9	22	150
2	75	130	8	28	188
3	54	95	4	17	171
4	60	84	4	16	108
5	60	95	5	15	42
6	67	120	10	26	249
7	73	150	6	28	160
8	59	87	4	19	65
9	70	90	9	178	214
10	59	84	8	20	269
11	60	110	8	17	373
12	69	170	11	29	349
13	59	104	8	21	156
14	62	125	10	24	265
15	61	93	6	20	129
16	66	130	5	25	128
17	66	130	6	35	89
18	66	130	8	21	169
19	77	140	7	27	167
20	73	123	5	26	137
21	61	85	4	20	99
22	71	107	7	22	110
23	64	133	7	23	203
24	56	100	3	19	175
25	62	90	4	19	116
26	60	140	9	20	66
27	47	90	4	19	119
28	68	112	6	22	246
29	63	105	9	24	155
30	63	90	7	19	182
31	67	113	9	24	167
32	58	100	7	17	20
33	60	47	4	11	139
34	74	100	4	19	33
35	62	140	5	23	140
36	64	110	7	25	158
37	62	110	5	20	90
38	64	123	5	24	140
39	59	70	6	13	45
40	64	100	5	20	168
41	80	110	7	21	73
42	61	65	6	12	120
43	79	110	7	24	90
44	64	135	2	24	81
45	70	140	5	24	130
46	60	110	6	21	176
47	61	40	4	14	294
48	75	125	8	27	293
49	62	116	3	23	138
50	61	102	7	22	190
51	68	112	8	22	146
52	58	103	6	22	154
53	73	106	7	21	136
54	61	94	2	14	21
55	67	115	6	24	145
56	58	90	5	17	92
57	70	102	4	19	81
58	63	95	6	18	95
59	77	120	4	21	77
60	73	100	6	20	89
61	60	87	3	21	107
62	75	140	7	27	60
63	76	135	5	26	184
64	63	87	6	22	151
65	60	110	5	19	122
66	66	120	3	21	230
67	73	132	8	24	216
68	63	130	6	25	116
69	57	95	7	16	106
70	72	110	6	26	154
71	70	120	5	21	123
72	73	110	6	27	136
73	68	138	5	25	160
74	67	32	6	9	13
75	72	123	5	25	100
76	66	110	3	25	107
77	44	90	3	17	114
78	72	122	5	27	121
79	63	134	8	27	216
80	82	124	7	25	119
81	64	84	8	18	191
82	63	130	11	20	190
83	70	156	6	21	200
84	65	124	9	24	191
85	73	116	5	27	160
86	67	114	6	27	150
87	74	127	7	23	126
88	69	134	3	28	160
89	59	150	11	23	145
90	70	120	6	21	159
91	69	40	7	10	108
92	69	170	9	24	157
93	72	110	6	21	170
94	72	125	4	24	138
95	58	130	6	18	150
96	73	127	4	23	65
97	82	100	2	23	40
98	66	135	7	27	208
99	73	140	8	26	136
100	67	120	8	22	219
101	68	120	8	23	204
102	73	124	5	24	178
103	50	87	6	21	150
104	61	127	9	21	173
