# Supplementary material for: Identification of quantitative trait loci underlying five major agronomic traits of soybean in three biparental populations by specific length amplified fragment sequencing (SLAF-seq)
Source: PeerJ. 2021 Dec 14;9:e12416. doi: 10.7717/peerj.12416 (PMC8679901; doi:10.7717/peerj.12416)
Supplement: Supplemental Information 10 [file peerj-09-12416-s010.xlsx]

## Sheet: Sheet1
	Flowering time	Plant height	Branch number	Node number of main stem	Pods per plant
1	67	70	3	17	112
2	71	110	4	22	59
3	68	94	7	17	168
4	73	108	4	23	140
5	71	94	2	19	120
6	73	105	5	22	174
7	66	100	8	21	162
8	73	120	6	25	212
9	53	65	4	16	137
10	70	90	6	17	315
11	72	90	8	18	79
12	70	115	4	22	126
13	68	108	4	22	134
14	67	124	4	23	120
15	71	90	5	15	123
16	70	91	4	17	111
17	66	95	5	22	86
18	80	90	0	15	50
19	48	70	3	17	81
20	67	100	5	21	144
21	69	60	3	14	102
22	70	126	4	22	132
23	75	105	3	18	55
24	50	72	4	14	75
25	52	49	2	11	47
26	64	74	4	15	89
27	80	134	10	25	292
28	63	35	4	10	38
29	72	120	3	23	143
30	71	115	2	21	99
31	72	104	6	21	154
32	71	115	3	22	90
33	47	96	3	18	130
34	47	72	6	15	72
35	68	126	4	24	82
36	69	60	6	16	107
37	70	82	3	17	59
38	67	110	5	20	117
39	84	152	6	26	70
40	55	47	3	11	51
41	70	114	6	21	132
42	53	120	2	21	113
43	70	120	4	23	137
44	68	120	2	21	108
45	71	134	5	24	102
46	80	104	8	20	167
47	80	120	6	23	160
48	68	86	5	16	148
49	45	34	2	8	16
50	58	80	5	15	104
51	73	110	3	19	120
52	70	110	7	19	114
53	82	130	7	22	77
54	52	104	2	21	73
55	56	108	5	17	47
56	44	80	4	16	78
57	54	81	3	16	95
58	79	130	7	23	114
59	73	127	3	23	118
60	57	110	3	21	190
61	67	79	8	11	156
62	77	127	1	20	93
63	68	114	5	22	180
64	43	68	3	14	70
65	66	86	4	15	121
66	53	48	1	14	25
67	58	90	6	12	132
68	69	132	3	21	77
69	68	117	5	20	182
70	72	118	6	24	127
71	72	113	3	22	101
72	70	120	4	24	163
73	67	100	4	23	166
74	69	75	5	15	99
75	77	120	6	25	181
76	83	122	3	21	89
77	70	133	3	23	124
78	70	84	7	17	80
79	57	90	6	18	117
80	63	83	2	16	65
81	76	100	4	20	163
82	70	132	4	24	96
83	81	160	9	26	139
84	50	65	6	14	132
85	74	128	6	24	154
86	51	70	3	17	177
87	81	150	9	25	209
88	68	103	9	23	162
89	88	90	5	19	102
90	43	62	8	16	150
91	67	92	2	20	51
92	81	108	3	22	123
93	72	110	7	20	159
94	50	76	4	16	120
95	73	112	4	17	140
96	72	120	4	19	161
97	82	122	4	23	128
98	74	94	4	20	132
99	47	67	5	15	56
100	73	110	1	21	86
101	52	107	4	20	106
102	83	150	4	24	243
103	71	118	6	21	132
104	64	60	5	15	96
105	43	60	5	15	162
