# Supplementary material for: Identification of quantitative trait loci underlying five major agronomic traits of soybean in three biparental populations by specific length amplified fragment sequencing (SLAF-seq)
Source: PeerJ. 2021 Dec 14;9:e12416. doi: 10.7717/peerj.12416 (PMC8679901; doi:10.7717/peerj.12416)
Supplement: Supplemental Information 12 [file peerj-09-12416-s012.xlsx]

## Sheet: Sheet1
	Flowering time	Plant height	Branch number	Node number of main stem	Pods per plant
1	70	88	9	23	210
2	66	88	5	24	150
3	50	95	4	24	169
4	65	99	6	22	189
5	65	85	7	20	160
6	75	82	5	24	104
7	66	94	7	23	157
8	54	89	5	21	199
9	71	86	8	25	306
10	64	82	7	9	233
11	68	79	4	26	145
12	73	88	1	23	77
13	65	84	5	22	109
14	50	92	3	21	115
15	78	83	3	21	66
16	72	83	4	21	70
17	60	89	2	20	62
18	68	77	5	16	191
19	62	90	4	17	101
20	65	87	7	22	184
21	60	90	4	22	118
22	66	85	2	22	87
23	73	90	5	23	174
24	63	90	3	22	118
25	61	90	5	21	198
26	69	80	2	22	147
27	51	86	5	22	152
28	63	93	7	22	193
29	76	97	7	21	119
30	68	87	4	22	109
31	65	85	3	20	95
32	56	83	4	20	97
33	61	100	2	24	107
34	65	78	4	14	70
35	68	76	3	21	86
36	63	99	5	23	167
37	61	85	4	20	61
38	71	80	3	22	61
39	51	85	3	18	42
40	65	78	5	20	68
41	67	90	4	22	155
42	74	84	2	13	33
43	64	100	3	25	96
44	62	95	4	16	153
45	55	91	4	20	189
46	68	79	4	21	150
47	61	90	6	21	190
48	61	101	0	22	75
49	61	96	2	23	98
50	69	90	4	21	103
51	68	94	1	22	54
52	60	95	6	21	184
53	65	106	3	26	88
54	72	82	1	19	42
55	63	96	5	22	142
56	50	96	4	25	95
57	77	88	5	23	108
58	55	91	3	19	133
59	76	102	4	25	106
60	72	95	3	23	84
61	70	68	9	15	148
62	67	83	6	21	124
63	65	85	6	24	124
64	69	95	3	26	110
65	57	90	5	17	176
66	64	95	3	20	197
67	62	89	4	19	124
68	67	99	7	23	144
69	67	96	2	20	58
70	66	91	8	22	162
71	56	81	3	18	116
72	72	84	6	21	99
73	76	91	3	16	108
74	66	89	2	22	86
75	60	97	3	21	88
76	56	95	3	21	72
77	54	100	5	22	134
78	58	82	1	14	63
79	71	88	3	20	87
80	61	88	5	23	150
81	55	75	-100	-100	-100
82	62	91	3	22	112
83	69	87	5	24	151
84	55	94	6	21	112
85	66	96	6	23	157
86	68	82	4	22	104
87	71	93	6	23	164
88	71	91	2	25	98
89	68	93	4	23	90
90	81	94	1	15	42
91	56	98	1	24	78
92	68	90	2	21	63
93	68	93	1	21	89
94	68	92	4	21	163
95	68	85	2	19	47
96	61	95	5	21	106
97	61	98	1	20	99
98	62	104	3	24	136
99	67	89	8	22	176
100	67	92	3	18	104
101	68	89	7	22	127
102	64	106	5	23	147
103	62	98	7	18	120
104	64	100	4	22	110
